# Supplementary material for: Enteric Pathogen Diversity in Infant Foods in Low-Income Neighborhoods of Kisumu, Kenya
Source: PubMed Central journal article supplement (PMC6388216; doi:10.3390/ijerph16030506), 2019-02-12
Supplement: ijerph-16-00506-s001.pdf [file ijerph-16-00506-s001.pdf]

**Table S1. Taqman Array Card Primer and Probes.**

| Pathogen         | Citation | Gene Target (25 characters max) | Forward Primer                     | Forward Primer #2                | Reverse Primer                    | Probe Sequence                 | Probe Sequence #2             |
|------------------|----------|---------------------------------|------------------------------------|----------------------------------|-----------------------------------|--------------------------------|-------------------------------|
| Adenovirus 40-41 | 1        | Fiber Gene                      | AAC TTTCTCT<br>CTTAATAGA<br>CGCC   |                                  | AGGGGGCTA<br>GAAAACAAA<br>A       | CTGACACGGG<br>CACTCT           |                               |
| Adenovirus       | 2        | Hexon                           | GCCACGGTG<br>GGTTTCTA<br>AACTT     |                                  | GCCCCAGTG<br>GTCTTACATG<br>CACATC | TGCACCAGAC<br>CCGGGCTCAG       |                               |
| Astrovirus       | 2        | Capsid                          | CAGTTGCTT<br>GCTGCGTTC<br>A        |                                  | CTTGCTAGCC<br>ATCACACTTC<br>T     | CACAGAAGA<br>GCAACTCCAT<br>CGC |                               |
| NorovirusGI      | 1        | ORF 1-2                         | CGYTGGATG<br>CGNTTYCAT<br>GA       |                                  | CTTAGACGCC<br>ATCATCATTY<br>AC    | TGGACAGGAG<br>ATCGC            |                               |
| NorovirusGI      | 2        | ORF 1-2                         | CARGARBCN<br>ATGTTYAGR<br>TGGATGAG |                                  | TCGACGCCAT<br>CTTCATTAC<br>A      | TGGGAGGGCG<br>ATCGCAATCT       |                               |
| Rotavirus        | 2        | NSP3                            | ACCATCTWC<br>ACRTRACCC<br>TCTATGAG |                                  | GGTCACATA<br>ACGCCCCTAT<br>AGC    | AGTAAAAGC<br>TAACACTGTC<br>AAA |                               |
| Sapovirus        | 2        | RdRp                            | GAYCAGGCT<br>CTCGCYACC<br>TAC      | TTTGAACA<br>AGCTGTGG<br>CATGCTAC | CCCTCCATYT<br>CAAACACTA           | CYTGTTTCAT<br>AGGTGGTRCA<br>G  | CAGCTGG<br>TACATTG<br>GTGGCAC |
| EAEC             | 2        | aaiC                            | ATTGTCCTCA<br>GGCATTTCAC           |                                  | ACGACACCC<br>CTGATAAAC<br>AA      | TAGTGCATAC<br>TCATCATTTA<br>AG |                               |
| EAEC             | 2        | aatA                            | CTGGCGAAA<br>GACTGTATC<br>AT       |                                  | TTTTGCTTCA<br>TAAGCCGAT<br>AGA    | TGGTTCATC<br>TATTACAGAC<br>AGC |                               |
| EPEC             | 2        | eae                             | CATTGATCA<br>GGATTTTCT<br>GGTGATA  |                                  | CTCATGCGG<br>AAATAGCCG<br>TTA     | ATACTGGCGA<br>GACTATTTC<br>A   |                               |
| EPEC             | 2        | bfpA                            | TGGTGCTTGC<br>GCTTGCT              |                                  | CGTTGCGCTC<br>ATTACTTCTG          | CAGTCTGCGT<br>CTGATTCCAA       |                               |
| ETEC             | 2        | LT                              | TTCCCACCG<br>GATCACCAA             |                                  | CAACCTTGTG<br>GTGCATGATG<br>A     | CTGGAGAGA<br>AGAACCCT          |                               |
| ETEC             | 2        | STh                             | GCTAAACCA<br>GYAGRGCT<br>TCAAAA    |                                  | CCCGGTACA<br>RGCAGGATT<br>ACAACA  | TGGTCCTGAA<br>AGCATGAA         |                               |
| ETEC             | 2        | STp                             | TGAATCACT<br>TGACTCTTCA<br>AAA     |                                  | GGCAGGATT<br>ACAACAAAG<br>TT      | TGAACAACAC<br>ATTTACTGCT       |                               |
| STEC             | 2        | Stx1                            | ACTTCTCGA<br>CTGCAAAGA<br>CGTATG   |                                  | ACAAATTATC<br>CCCTGWGCC<br>ACTATC | CTCTGCAATA<br>GGTACTCCA        |                               |

|                          |   |           |                                     |                                  |                                  |
|--------------------------|---|-----------|-------------------------------------|----------------------------------|----------------------------------|
| STEC                     | 2 | Stx2      | CCACATCGG<br>TGCTGTAT<br>TAACC      | GGTCAAAAC<br>GCGCCTGAT<br>AG     | TGCTGTGGA<br>TATACGAGG           |
| EHEC<br>_E_col<br>i_0157 | 1 | rfbE      | TTTCACACTT<br>ATTGGATGG<br>TCTCAA   | CGATGAGTTT<br>ATCTGCAAG<br>GTGAT | CTCTCTTCTCT<br>CTGCGGTCCT        |
| Aero<br>monas            | 1 | Aerolysin | TYCGYTACC<br>AGTGGGACA<br>AG        | CCRGCAAAC<br>TGGCTCTCG           | CAGTTCAGT<br>CCCACCACTT          |
| B_frag<br>ilis           | 1 | EGBF      | GGGACAAGG<br>ATTCTACCA<br>GCTTTATA  | ATTCCGCAAT<br>CTCATTATC<br>ATT   | CAATGGCGAA<br>TCCATCAG           |
| C_diff<br>icile          | 2 | tcdB      | GGTATTACC<br>TAATGCTCC<br>AAATAG    | TTTGTGCCAT<br>CATTTTCTAA<br>GC   | CCTGGTGTCC<br>ATCCTGTTTC         |
| H_Pyl<br>ori             | 1 | ureC      | GACACCAGA<br>AAAAGCGGC<br>TA        | AGCGCATGT<br>CTTCGGTTAA<br>A     | TACTAAAGC<br>GTTTTCTACC          |
| Salmo<br>nella_<br>enter | 1 | ttr       | CTCACCAGG<br>AGATTACAA<br>CATGG     | AGCTCAGAC<br>CAAAAGTGA<br>CCATC  | CACCGACGGC<br>GAGACCGACT<br>TT   |
| Shigell<br>a-<br>EIEC    | 2 | ipaH      | CCTTTTCCGC<br>GTTCCTTGA             | CGGAATCCG<br>GAGGTATTGC          | CGCCTTCCG<br>ATACCGTCTC<br>TGCA  |
| V_Ch<br>olerae           | 1 | hlyA      | ATCGTCAGT<br>TTGGAGCCA<br>GT        | TCGATGCGTT<br>AAACACGAA<br>G     | ACCGATGCGA<br>TTGCCCAA           |
| V_par<br>ahaem<br>olytic | 1 | toxR      | GTTTGGCGT<br>GAGCAAGGT<br>TT        | AAGCGGGCT<br>TAGGCGTTC           | TCAAGCGATT<br>TCTACTCTGC<br>G    |
| Crypt<br>ospori<br>dium  | 2 | 18s rRNA  | GGGTTGTATT<br>TATTAGATA<br>AAGAACCA | AGGCCAATA<br>CCCTACCGTC<br>T     | TGACATATCA<br>TTCAAGTTTCT<br>GAC |
| C_ho<br>minus            | 1 | LIB13     | TCCTTGAAA<br>TGAATATTTG<br>TGACTCG  | AAATGTGGT<br>AGTTGCGGTT<br>GAAA  | CTTACTTCGTG<br>GCGGCGT           |
| C_par<br>vum             | 1 | LIB13     | TCCTTGAAA<br>TGAATATTTG<br>TGACTCG  | TTAATGTGGT<br>AGTTGCGGTT<br>GAAC | TATCTCTTCGT<br>AGCGGCGTA         |
| E_hist<br>olytica        | 2 | 18s rRNA  | ATTGTCGTG<br>GCATCCTAA<br>CTCA      | GCGGACGGC<br>TCATTATAAC<br>A     | TCATTGAATG<br>AATTGGCCAT<br>TT   |
| Giardi<br>a              | 2 | 18s rRNA  | GACGGCTCA<br>GGACAACGG<br>TT        | TTGCCAGCGG<br>TGTCCG             | CCCGCGGCGG<br>TCCCTGCTAG         |
| A_lu<br>mbri<br>coides   | 1 | ITS1      | GCCACATAG<br>TAAATTGCA<br>CACAAAT   | GCCTTTCTAA<br>CAAGCCCAA<br>CAT   | TTGGCGGACA<br>ATTGCATGCG<br>AT   |
| N_am<br>erican<br>us     | 1 | ITS2      | CTGTTTGTCG<br>AACGGTACT<br>TGC      | ATAACAGCG<br>TGCACATGTT<br>GC    | CTGTACTACG<br>CATTGTATAC         |

|                   |   |                                     |                                  |                                       |                                       |
|-------------------|---|-------------------------------------|----------------------------------|---------------------------------------|---------------------------------------|
| S_ster<br>coralis | 1 | Dispersed<br>repetitive<br>sequence | TCCAGAAAA<br>GTCTTCACTC<br>TCCAG | TGCGTTAGAA<br>TTTAGATATT<br>ATTGTTGCT | TCAGCTCCAG<br>TTGAACAACA<br>GCCTCCAA  |
| T_tric<br>hiura   | 2 | 18s rRNA                            | TTGAAACGA<br>CTTGCTCATC<br>AACTT | CTGATTCTCC<br>GTAAACCGTT<br>GTC       | CGATGGTACG<br>CTACGTGCTT<br>ACCATGG   |
| MS2_              | 2 | MS2g1                               | TGGCACTAC<br>CCCTCTCCGT<br>ATCAC | GTACGGGCG<br>ACCCACGA<br>TGAC         | CACATCGATA<br>GATCAAGGTG<br>CCTACAAGC |

References:

1. Liu J, Platts-Mills JA, Juma J, Kabir F, Nkeze J, Okoi C, Operario DJ, Uddin J, Ahmed S, Alonso PL, Antonio M, Becker SM, Blackwelder WC, Breiman RF, Faruque AS, Fields B, Gratz J, Haque R, Hossain A, Hossain MJ, Jarju S, Qamar F, Iqbal NT, Kwambana B, Mandomando I, McMurry TL, Ochieng C, Ochieng JB, Ochieng M, Onyango C, Panchalingam S, Kalam A, Aziz F, Qureshi S, Ramamurthy T, Roberts JH, Saha D, Sow SO, Stroup SE, Sur D, Tamboura B, Taniuchi M, Tennant SM, Toema D, Wu Y, Zaidi A, Nataro JP, Kotloff KL, Levine MM, Houpt ER. 2016. Use of quantitative molecular diagnostic methods to identify causes of diarrhoea in children: a reanalysis of the GEMS case-control study. *Lancet* 388:1291-301.
2. Liu J, Gratz J, Amour C, Kibiki G, Becker S, Janaki L, Verweij JJ, Taniuchi M, Sobuz SU, Haque R. 2013. A

laboratory-developed TaqMan Array Card for simultaneous detection of 19 enteropathogens. *Journal of clinical microbiology* 51:472-480.

## Inhibition and MS2 Extraction Efficiency of ZymoBIOMICS™ DNA/RNA Extraction

### Mini-kit.

Among the food samples that were tested for inhibition, only 1% were positive for inhibition (1/77). One-way ANOVA showed that Ct values of field spiked MS2 virus were not statistically different between 77 food samples plus the 10 water-only controls (p-value= 0.53) and between individual food types (p-value = 0.47) (Table S2). The lack of inhibition and high extraction efficiency in recovery of MS2 indicated that the DNA and RNA extracted from food was of good quality and was not biased by food physical properties.

**Table S2. MS2 Ct Values Across Food Type.**

| Food Type                | Number of Samples | Mean CT | Standard Deviation |
|--------------------------|-------------------|---------|--------------------|
| Water only field control | 10                | 13.0    | 0.6                |

---

|          |    |      |     |
|----------|----|------|-----|
| Milk     | 11 | 13.2 | 1.3 |
| Porridge | 53 | 12.7 | 0.9 |
| Tea      | 3  | 12.5 | 0.3 |
| Water    | 10 | 13.1 | 1.6 |

---
